# Supplementary material for: A dual functional fluorescent sensor for the detection of Al3+ and Zn2+ in different solvents
Source: Royal Society of Chemistry journal article supplement (doi:10.1039/c9nj03298c), 2019-01-01
Supplement: c9nj03298c1.pdf [file c9nj03298c1.pdf]

## Supporting Information

A dual functional fluorescence sensor for detection of Al<sup>3+</sup> and Zn<sup>2+</sup> in different solvent.

Yuankang Xu<sup>a</sup>, Hanyu Wang<sup>a</sup>, Jinyan Zhao<sup>b</sup>, Xiaofeng Yang<sup>a</sup>, Meishan Pei<sup>a</sup>, Guangyou Zhang<sup>a</sup> and Yanxia Zhang<sup>a,\*</sup>

<sup>a</sup> *School of chemistry and chemical engineering, University of Jinan, Jinan 250022, China, E-mail address: chm\_zhangyx@ujn.edu.cn.*

<sup>b</sup> *Jinan Technician college, China. E-mail address: zhao\_jin\_yan@126.com.*

**\*Corresponding author:** chm\_zhangyx@ujn.edu.cn (Yanxia Zhang).

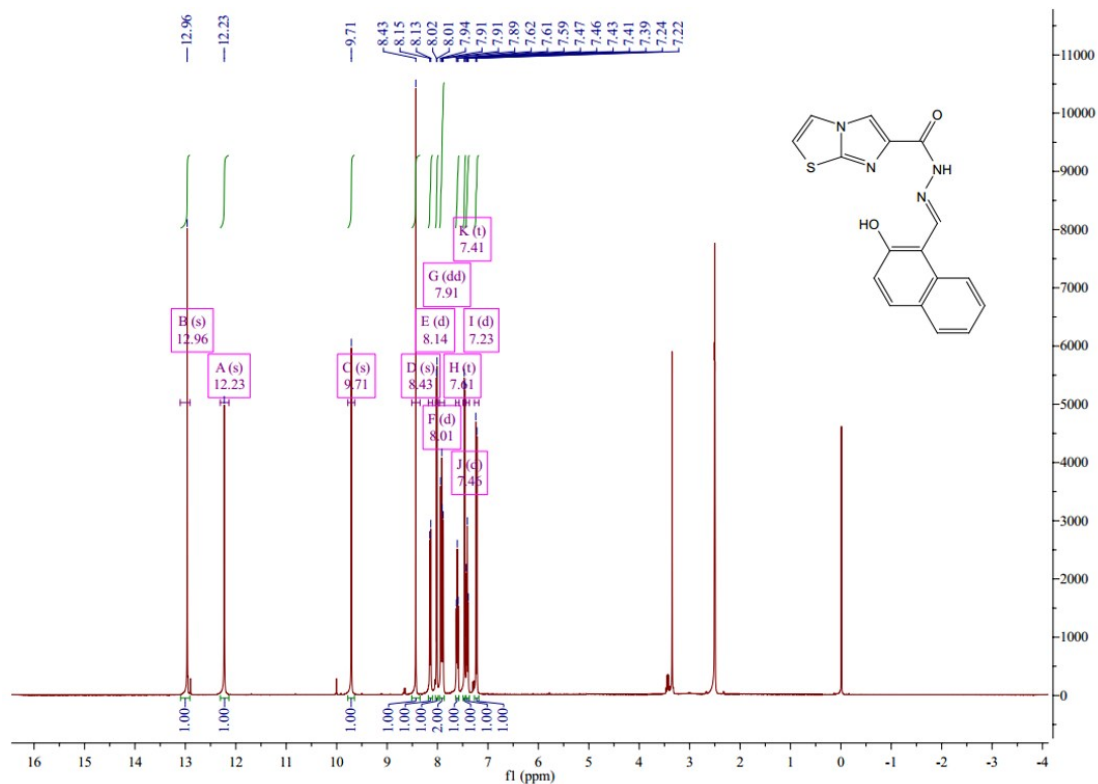

Fig. S1. <sup>1</sup>H NMR spectrum of X.

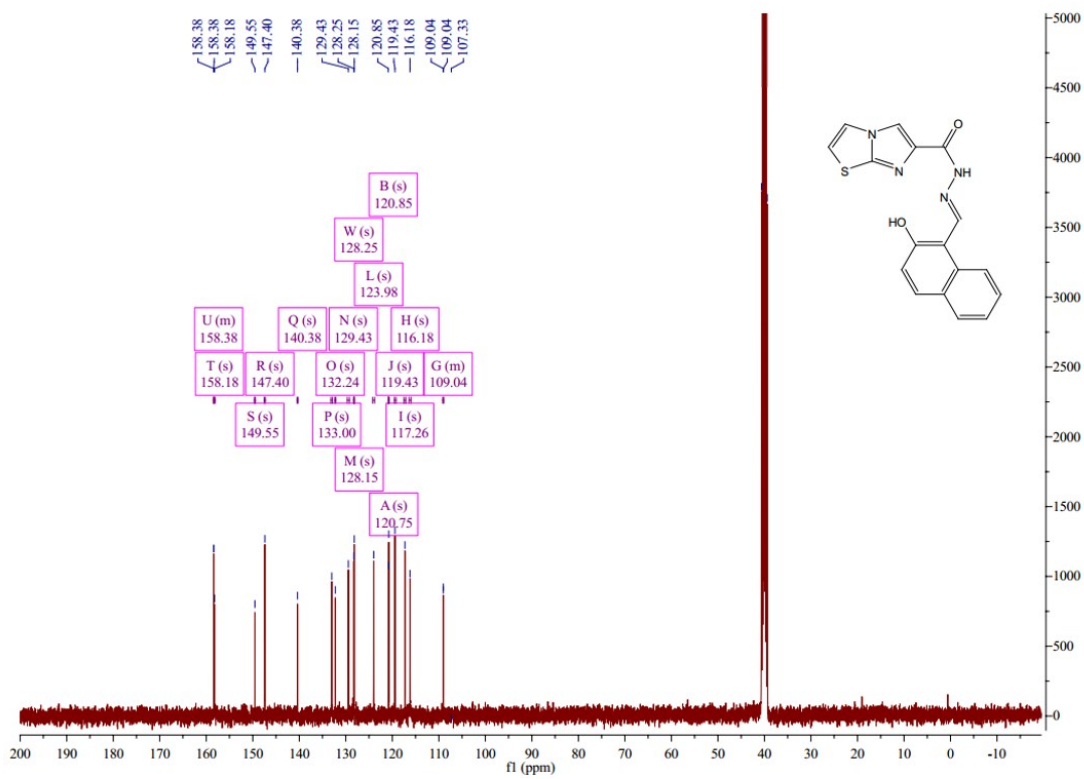

Fig. S2. <sup>13</sup>C NMR spectrum of X.

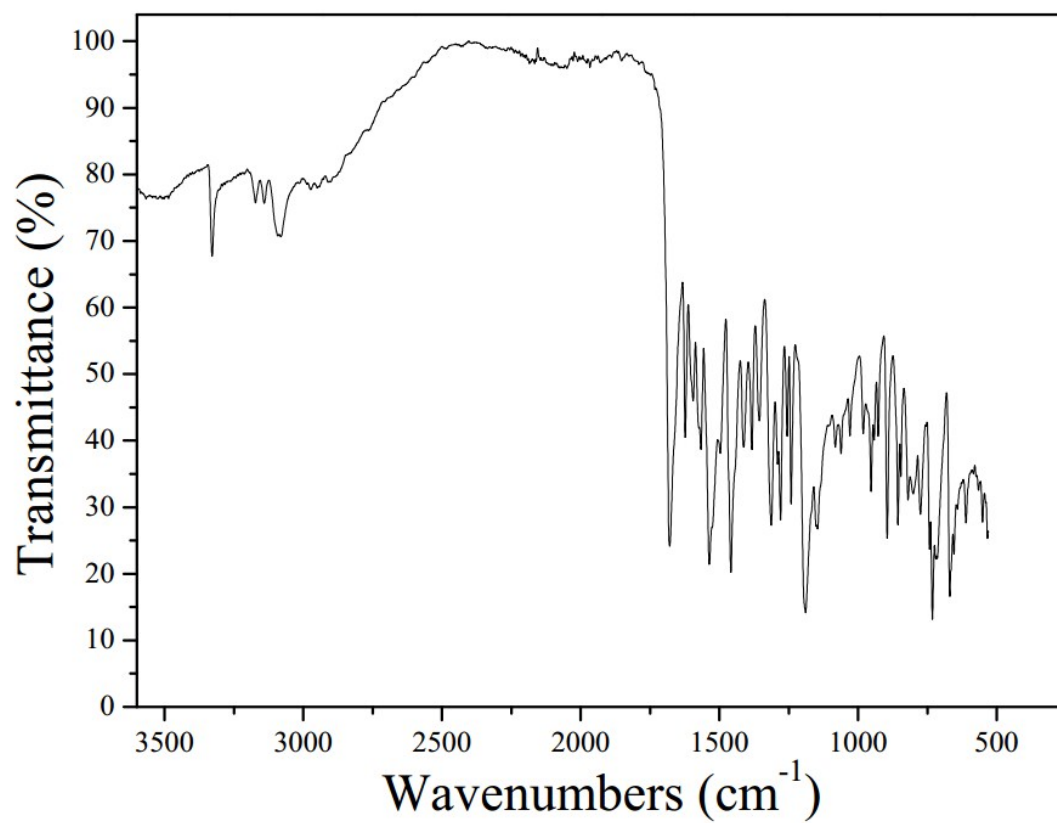

Fig. S3. The FTIR spectra of X.

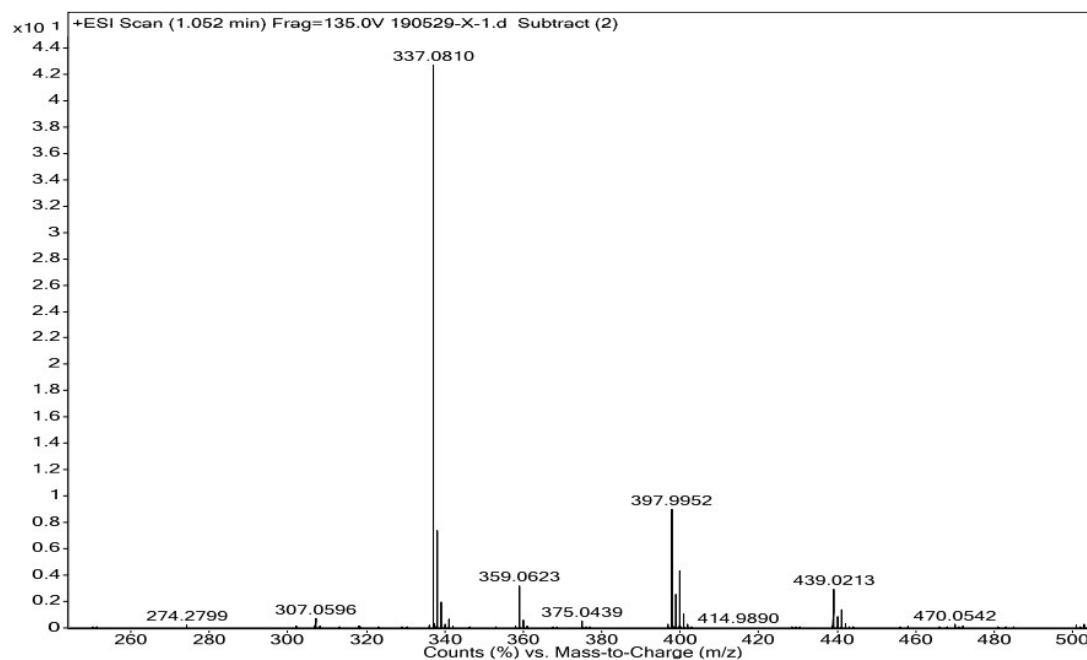

Fig. S4. ESI mass spectrum of X.

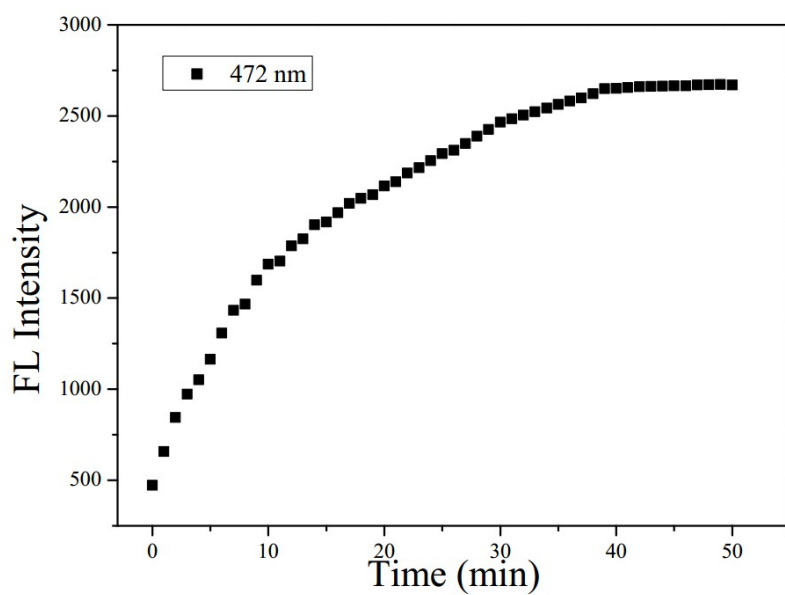

Fig. S5. Time course for the fluorescence response of **X** ( $1 \times 10^{-5}$  M) at 472 nm upon the addition of  $\text{Al}^{3+}$  (10 equiv.) in methanol/ $\text{H}_2\text{O}$  buffer solution (v/v = 9:1, tris = 10 mM, pH = 7.4).

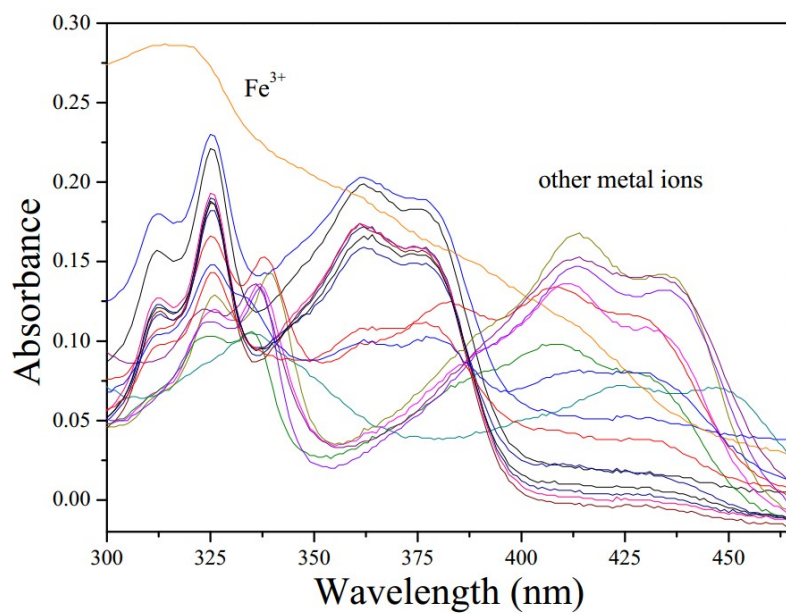

Fig. S6. Absorption spectra of **X** ( $1 \times 10^{-5}$  M) upon the addition of various metal ions (10 equiv.) in methanol/ $\text{H}_2\text{O}$  buffer solution (v/v = 9:1, tris = 10 mM, pH = 7.4).

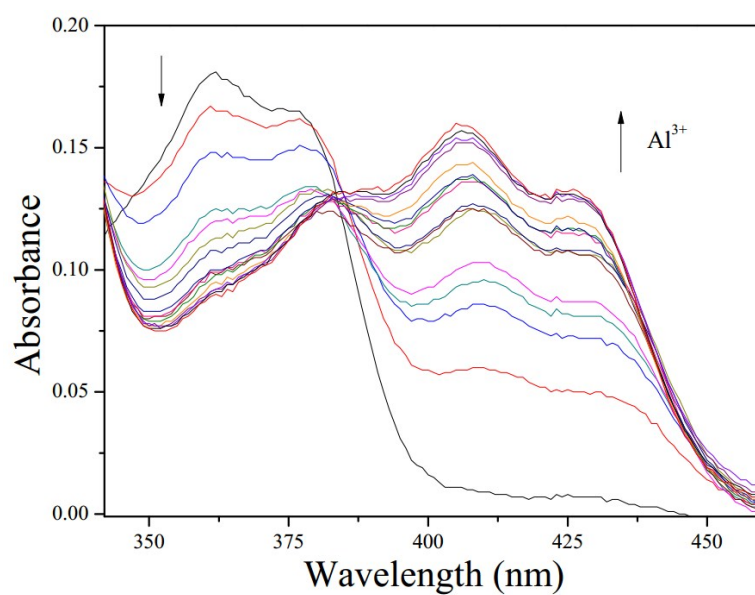

Fig. S7. Absorption titration spectra of **X** ( $1 \times 10^{-5}$  M) upon the addition of  $\text{Al}^{3+}$  (0 - 15 equiv.) in methanol/ $\text{H}_2\text{O}$  buffer solution (v/v = 9:1, tris = 10 mM, pH = 7.4).

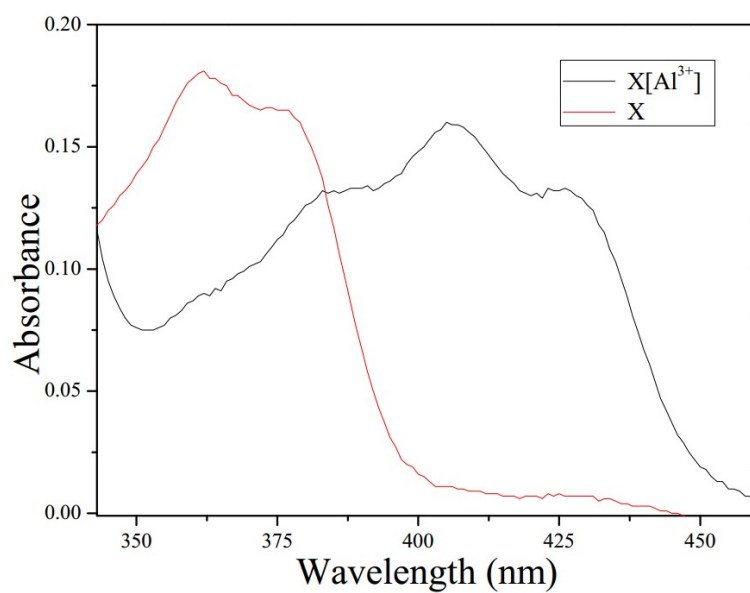

Fig. S8. Absorption spectra of **X** and **X[Al<sup>3+</sup>]** in methanol/ $\text{H}_2\text{O}$  buffer solution (v/v = 9:1, tris = 10 mM, pH = 7.4).

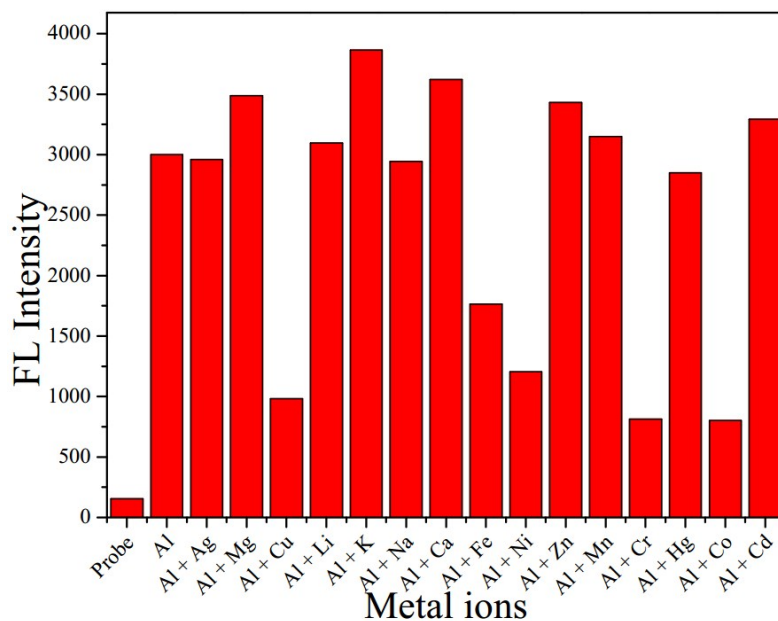

Fig. S9. Fluorescence intensity of **X** and its complexation with Al<sup>3+</sup> in the presence of other metal ions (Ag<sup>+</sup>, Mg<sup>2+</sup>, Cu<sup>2+</sup>, Li<sup>+</sup>, K<sup>+</sup>, Na<sup>+</sup>, Ca<sup>2+</sup>, Fe<sup>3+</sup>, Ni<sup>2+</sup>, Zn<sup>2+</sup>, Mn<sup>2+</sup>, Cr<sup>3+</sup>, Hg<sup>2+</sup>, Co<sup>2+</sup> and Cd<sup>2+</sup>) in methanol/H<sub>2</sub>O buffer solution (v/v = 9:1, tris = 10 mM, pH = 7.4).

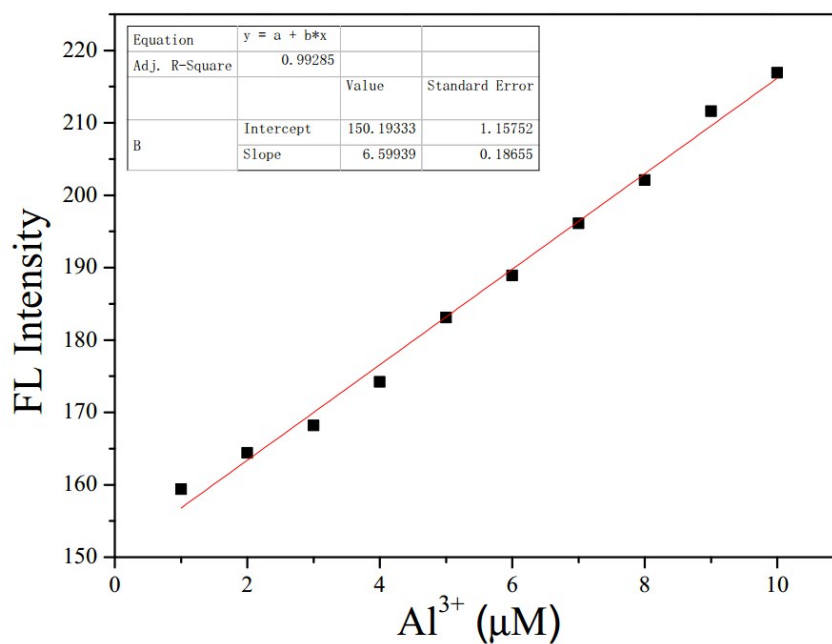

Fig. S10. Fluorescence intensity of **X** at 472 nm with the addition of Al<sup>3+</sup> (0 - 1 equiv.)

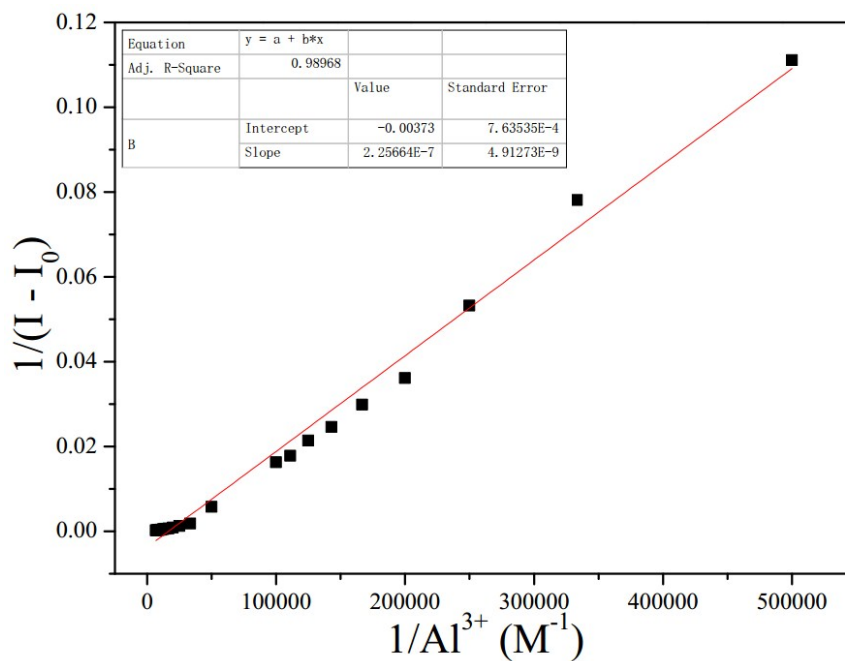

Fig. S11. Benesi-Hilderbrand plot of X with Al<sup>3+</sup>.

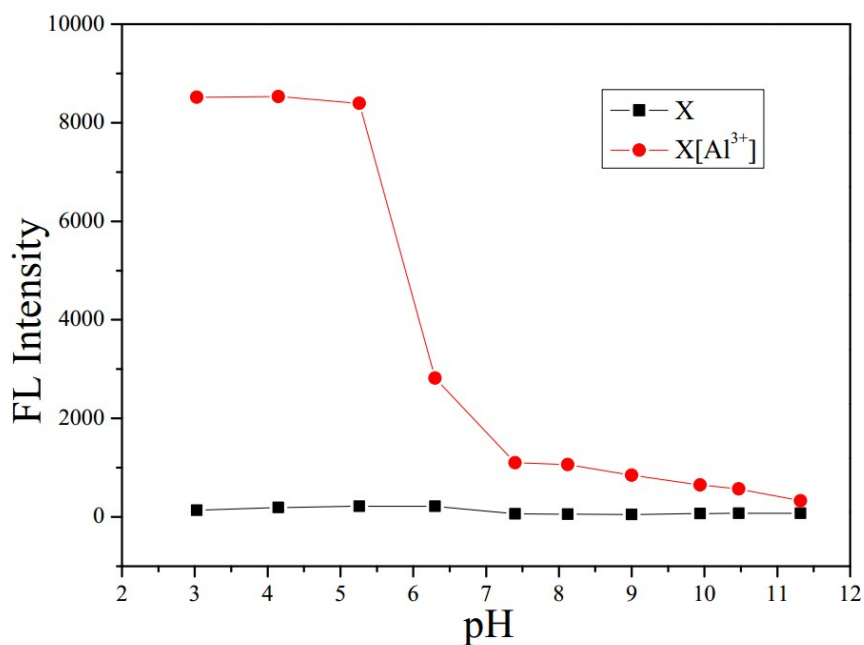

Fig. S12. The influence of pH value of solution on the fluorescence of X and X[Al<sup>3+</sup>] at the slits of excitation and emission were 10 nm and 10 nm, respectively.

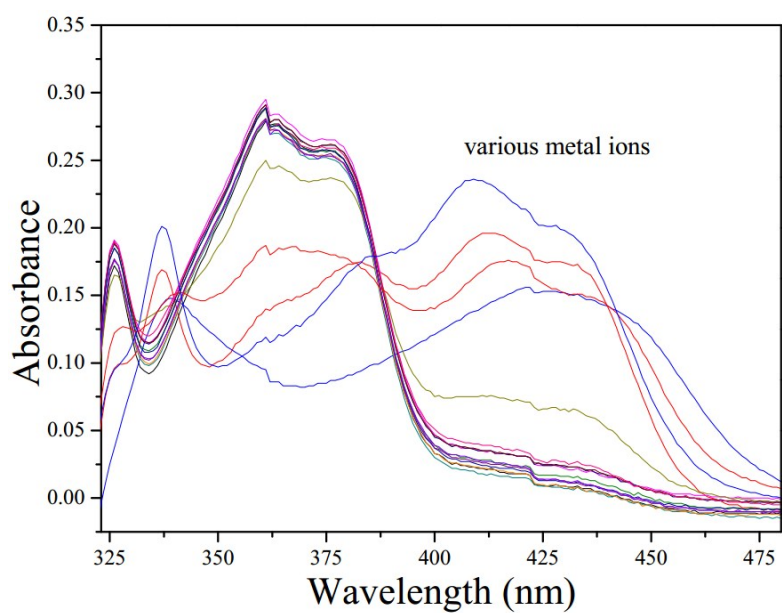

Fig. S13. Absorption spectra of **X** ( $1 \times 10^{-5}$  M) upon the addition of various metal ions (5 equiv.) in ethanol/ $\text{H}_2\text{O}$  buffer solution ( $v/v = 9:1$ , tris = 10 mM, pH = 7.4).

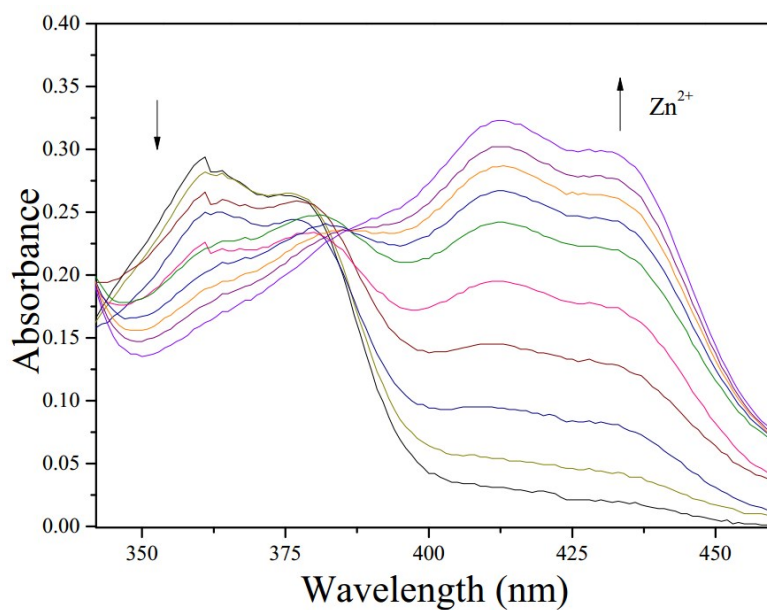

Fig. 14. Absorption titration spectra of **X** ( $1 \times 10^{-5}$  M) upon the addition of  $\text{Zn}^{2+}$  (0 - 5 equiv.) in ethanol/ $\text{H}_2\text{O}$  buffer solution ( $v/v = 9:1$ , tris = 10 mM, pH = 7.4).



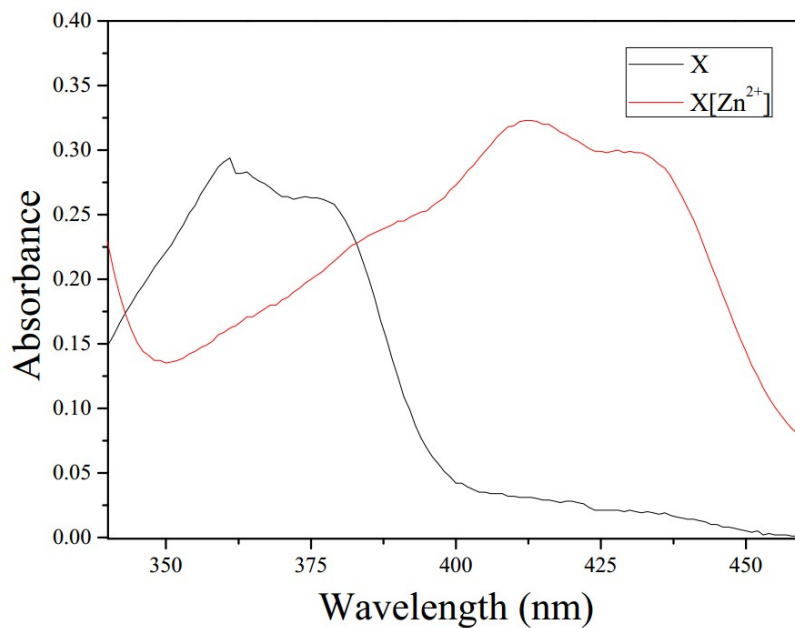

Fig. S15. Absorption spectra of **X** and **X[Zn<sup>2+</sup>]** in ethanol/H<sub>2</sub>O buffer solution (v/v = 9:1, tris = 10 mM, pH = 7.4).

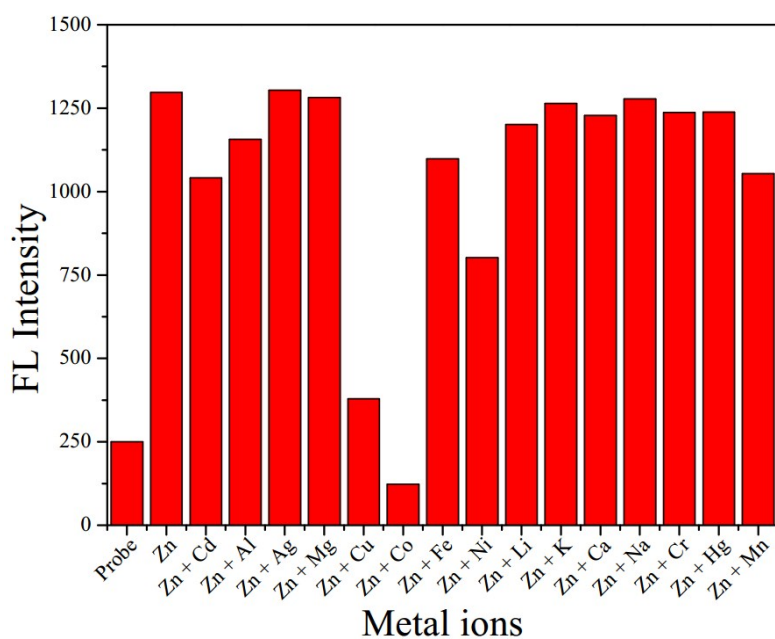

Fig. S16. Fluorescence intensity of **X** and its complexation with **Zn<sup>2+</sup>** in the presence of other metal ions (Cd<sup>2+</sup>, Al<sup>3+</sup>, Ag<sup>+</sup>, Mg<sup>2+</sup>, Cu<sup>2+</sup>, Co<sup>2+</sup>, Fe<sup>3+</sup>, Ni<sup>2+</sup>, Li<sup>+</sup>, K<sup>+</sup>, Ca<sup>2+</sup>, Na<sup>+</sup>, Cr<sup>3+</sup>, Hg<sup>2+</sup> and Mn<sup>2+</sup>) in ethanol/H<sub>2</sub>O buffer solution (v/v = 9:1, tris = 10 mM, pH = 7.4).

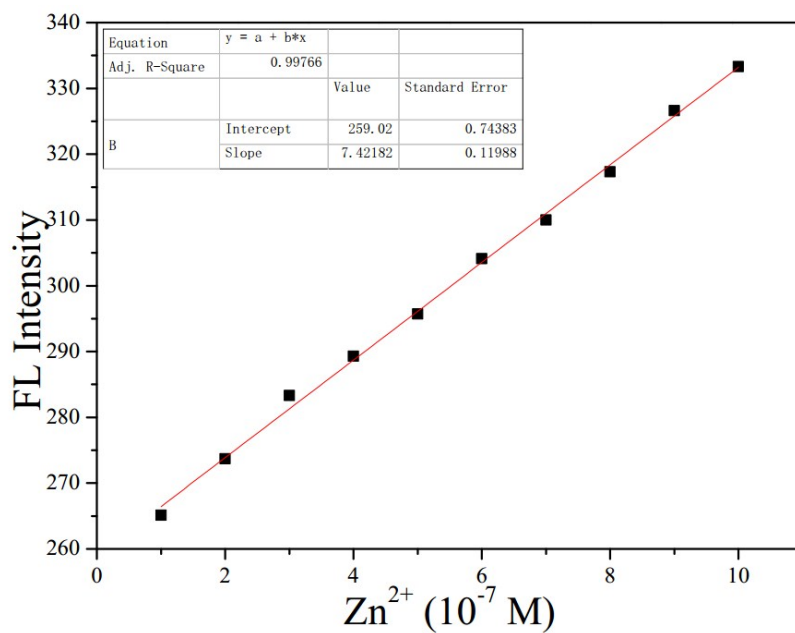

Fig. S17. Fluorescence intensity of X at 484 nm with the addition of Zn<sup>2+</sup> (0 - 1 × 10<sup>-6</sup> M)

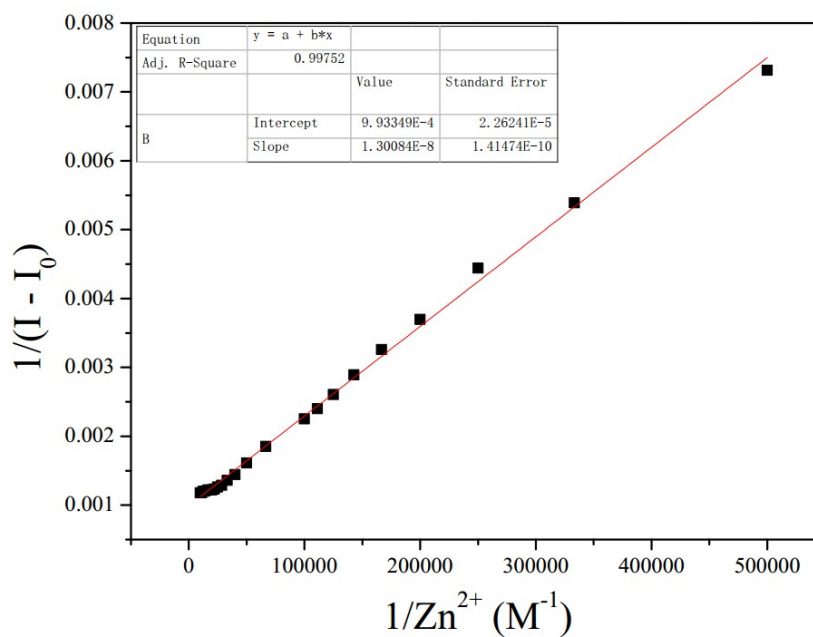

Fig. S18. Benesi-Hilderbrand plot of X with Zn<sup>2+</sup>.

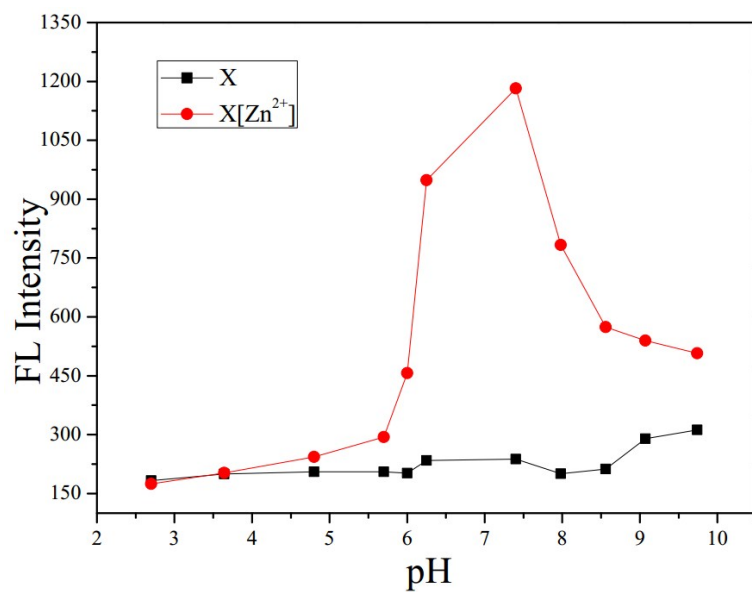

Fig. S19. The influence of pH value of solution on the fluorescence of X and X[Zn<sup>2+</sup>] at the slit width value of 20 nm.

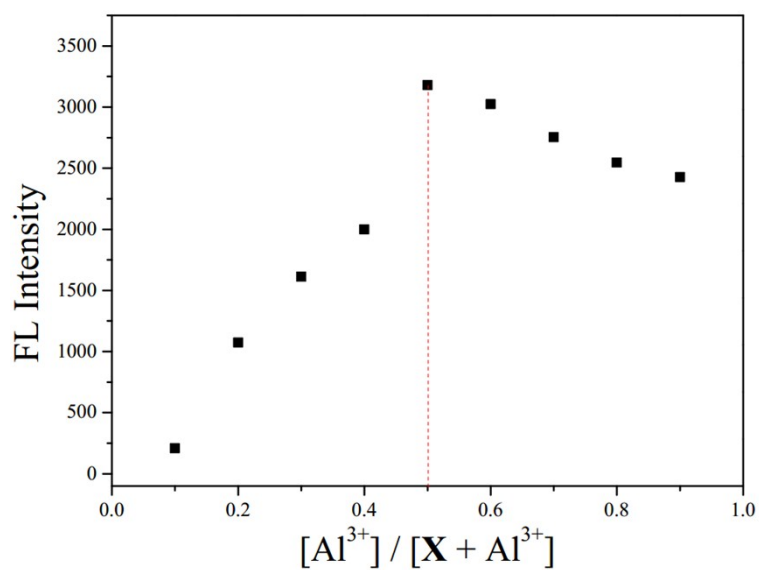

Fig. S20. Job's plot of X with Al<sup>3+</sup> complexation in methanol/H<sub>2</sub>O buffer solution (v/v = 9:1, tris = 10 mM, pH = 7.4).

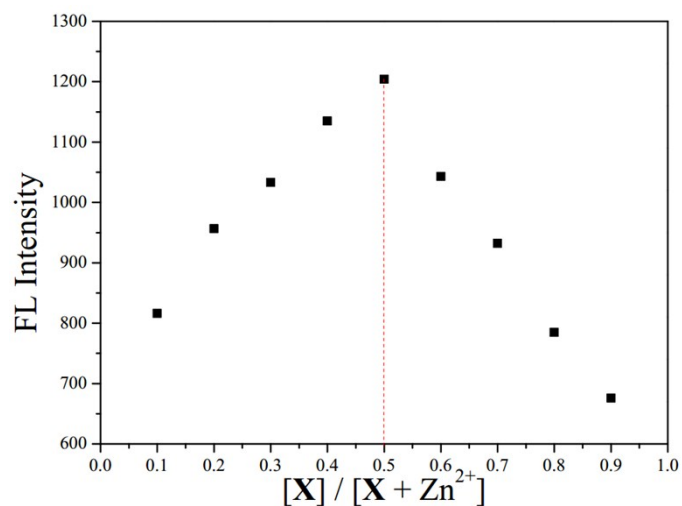

Fig. S21. Job's plot of **X** with  $Zn^{2+}$  complexation in ethanol/ $H_2O$  buffer solution (v/v = 9:1, tris = 10 mM, pH = 7.4).

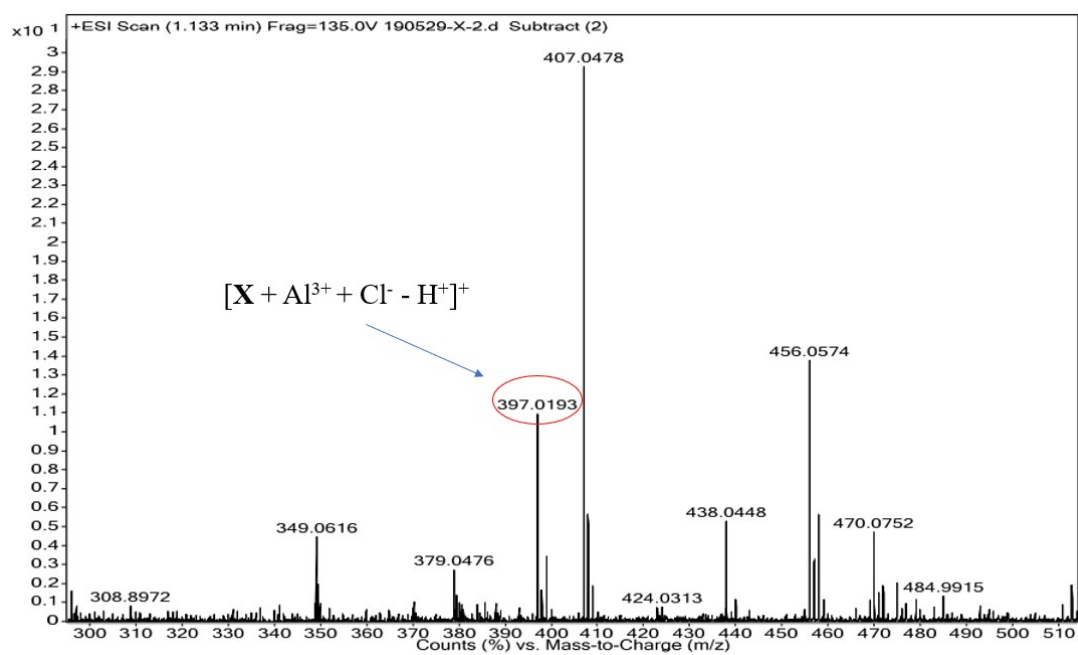

Fig. S22. ESI mass spectrum of complex  $X[Al^{3+}]$ .

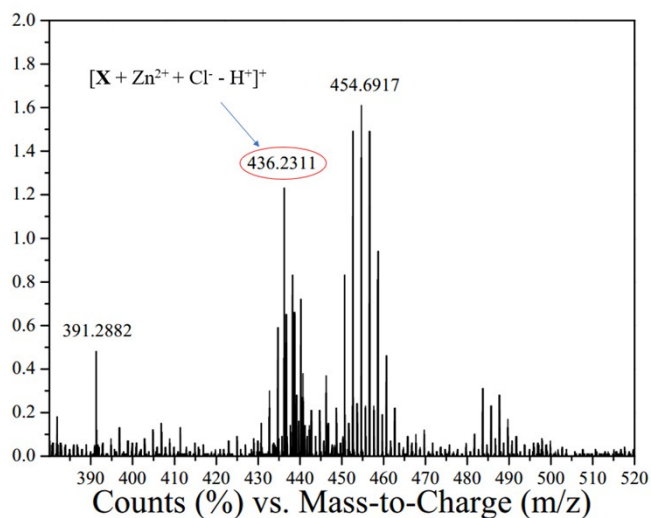

Fig. S23. ESI mass spectrum of complex  $X[Zn^{2+}]$ .

Table S1. Determination of  $Al^{3+}$  concentrations in tap water samples

| sample | $Al^{3+}$ added (M)  | $Al^{3+}$ recovered (M) | Recovery (%) | RSD (%) |
|--------|----------------------|-------------------------|--------------|---------|
| 1      | $1.0 \times 10^{-5}$ | $9.04 \times 10^{-6}$   | 90.4         | 0.57    |
| 2      | $5.0 \times 10^{-5}$ | $4.73 \times 10^{-5}$   | 94.7         | 1.70    |
| 3      | $1.0 \times 10^{-4}$ | $9.97 \times 10^{-5}$   | 99.7         | 1.13    |

Table S2. Determination of  $Zn^{2+}$  concentrations in tap water samples

| sample | $Zn^{2+}$ added (M)  | $Zn^{2+}$ recovered (M) | Recovery (%) | RSD (%) |
|--------|----------------------|-------------------------|--------------|---------|
| 1      | $1.0 \times 10^{-5}$ | $1.10 \times 10^{-5}$   | 110.1        | 1.38    |
| 2      | $2.0 \times 10^{-5}$ | $2.28 \times 10^{-5}$   | 114.3        | 0.64    |
| 3      | $3.0 \times 10^{-5}$ | $3.10 \times 10^{-5}$   | 103.4        | 0.46    |

Table S3. XYZ coordinate of the optimized structure of **X**.

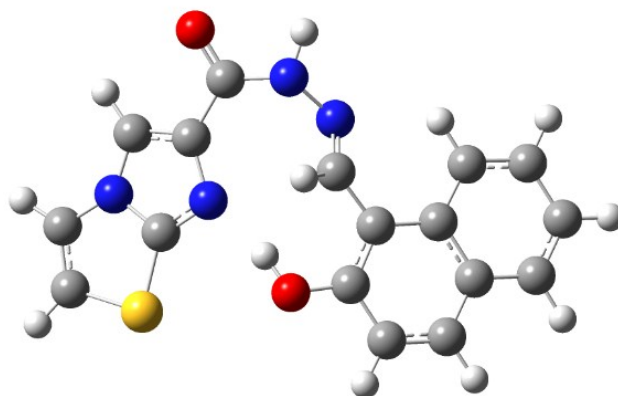

Standard orientation:

| Center<br>Number | Atomic<br>Number | Atomic<br>Type | Coordinates (Angstroms) |           |           |
|------------------|------------------|----------------|-------------------------|-----------|-----------|
|                  |                  |                | X                       | Y         | Z         |
| 1                | 6                | 0              | 5.380763                | -0.299407 | -1.336343 |
| 2                | 6                | 0              | 6.022813                | 0.738092  | -0.598627 |
| 3                | 6                | 0              | 3.635847                | 0.464107  | 0.024297  |
| 4                | 6                | 0              | 2.264502                | -1.277847 | 0.066319  |
| 5                | 6                | 0              | 3.189357                | -1.511402 | -0.969431 |
| 6                | 6                | 0              | 1.147241                | -2.244796 | 0.500301  |
| 7                | 6                | 0              | -0.829322               | 0.091960  | 0.994782  |
| 8                | 6                | 0              | -2.051928               | 0.846892  | 0.440767  |
| 9                | 6                | 0              | -2.018713               | 2.242837  | 0.321801  |
| 10               | 6                | 0              | -3.241363               | 2.997710  | -0.232207 |
| 11               | 6                | 0              | -4.387182               | 2.288701  | -0.617351 |
| 12               | 6                | 0              | -4.423671               | 0.754698  | -0.486605 |
| 13               | 6                | 0              | -3.311049               | 0.067764  | 0.017503  |
| 14               | 6                | 0              | -3.347501               | -1.466249 | 0.148205  |
| 15               | 6                | 0              | -4.493308               | -2.175268 | -0.236932 |
| 16               | 6                | 0              | -5.715995               | -1.420392 | -0.790856 |
| 17               | 6                | 0              | -5.682815               | -0.024443 | -0.909809 |
| 18               | 16               | 0              | 4.847619                | 1.692710  | 0.347532  |
| 19               | 7                | 0              | 3.905610                | -0.261500 | -1.193034 |
| 20               | 7                | 0              | 2.550310                | 0.042058  | 0.687144  |
| 21               | 7                | 0              | 0.251323                | -1.883030 | 1.608170  |
| 22               | 7                | 0              | -0.860050               | -1.196613 | 1.104491  |
| 23               | 8                | 0              | 1.001230                | -3.344653 | -0.093468 |
| 24               | 8                | 0              | -0.849519               | 2.966308  | 0.714828  |
| 25               | 1                | 0              | 5.904746                | -1.029406 | -1.917238 |
| 26               | 1                | 0              | 7.078873                | 0.910229  | -0.596684 |
| 27               | 1                | 0              | 3.341390                | -2.433687 | -1.490172 |

|    |   |   |           |           |           |
|----|---|---|-----------|-----------|-----------|
| 28 | 1 | 0 | -0.053182 | -2.713148 | 2.075264  |
| 29 | 1 | 0 | 0.045522  | 0.633258  | 1.288943  |
| 30 | 1 | 0 | -2.497971 | -1.990739 | 0.533080  |
| 31 | 1 | 0 | -4.518635 | -3.241106 | -0.146126 |
| 32 | 1 | 0 | -6.590854 | -1.961744 | -1.084898 |
| 33 | 1 | 0 | -6.532341 | 0.500049  | -1.294682 |
| 34 | 1 | 0 | -5.236691 | 2.813194  | -1.002265 |
| 35 | 1 | 0 | -3.216005 | 4.063545  | -0.323061 |
| 36 | 1 | 0 | -0.256844 | 3.048816  | -0.035853 |

---

Table S4. XYZ coordinate of the optimized structure of  $X[Al^{3+}]$ .

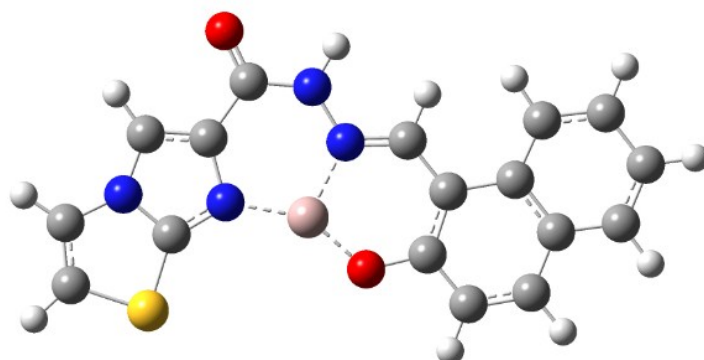

Standard orientation:

| Center Number | Atomic Number | Atomic Type | Coordinates (Angstroms) |           |           |
|---------------|---------------|-------------|-------------------------|-----------|-----------|
|               |               |             | X                       | Y         | Z         |
| 1             | 6             | 0           | 6.589017                | 0.303986  | 0.181609  |
| 2             | 6             | 0           | 6.760004                | -1.071839 | 0.539538  |
| 3             | 6             | 0           | 4.472762                | -0.571591 | -0.210221 |
| 4             | 6             | 0           | 3.132250                | 1.319098  | -0.133185 |
| 5             | 6             | 0           | 4.491148                | 1.730106  | -0.237834 |
| 6             | 6             | 0           | 1.831080                | 2.363416  | -0.003442 |
| 7             | 6             | 0           | -1.892358               | 0.984997  | 0.166953  |
| 8             | 6             | 0           | -2.824243               | -0.414988 | 0.052073  |
| 9             | 6             | 0           | -2.674665               | -1.987812 | -0.033015 |
| 10            | 6             | 0           | -3.977018               | -2.818086 | -0.093574 |
| 11            | 6             | 0           | -5.241048               | -2.244113 | -0.092297 |
| 12            | 6             | 0           | -5.404898               | -0.734156 | -0.029890 |
| 13            | 6             | 0           | -4.286821               | 0.103336  | 0.036552  |
| 14            | 6             | 0           | -4.496902               | 1.630752  | 0.100378  |
| 15            | 6             | 0           | -5.787321               | 2.174347  | 0.091251  |
| 16            | 6             | 0           | -7.009162               | 1.246929  | 0.017515  |
| 17            | 6             | 0           | -6.826067               | -0.138105 | -0.039996 |
| 18            | 16            | 0           | 5.344223                | -2.062987 | 0.073173  |
| 19            | 7             | 0           | 5.326680                | 0.538073  | -0.559693 |
| 20            | 7             | 0           | 3.225803                | -0.173611 | -0.157052 |
| 21            | 7             | 0           | 0.274645                | 2.303159  | 0.425731  |
| 22            | 7             | 0           | -0.572352               | 1.128550  | 0.221386  |
| 23            | 8             | 0           | 2.168126                | 3.538710  | -0.301190 |
| 24            | 8             | 0           | -1.508522               | -2.964108 | -0.077125 |
| 25            | 1             | 0           | 7.287102                | 1.075966  | 0.429849  |
| 26            | 1             | 0           | 7.621831                | -1.457303 | 1.043098  |
| 27            | 1             | 0           | 4.853351                | 2.727628  | -0.101238 |
| 28            | 1             | 0           | -0.176289               | 3.038714  | -0.079855 |



|    |    |   |           |           |           |
|----|----|---|-----------|-----------|-----------|
| 29 | 1  | 0 | -2.449368 | 1.897595  | 0.209438  |
| 30 | 1  | 0 | -3.648460 | 2.280655  | 0.152071  |
| 31 | 1  | 0 | -5.921947 | 3.234916  | 0.135617  |
| 32 | 1  | 0 | -7.996615 | 1.658976  | 0.010215  |
| 33 | 1  | 0 | -7.675714 | -0.786473 | -0.091176 |
| 34 | 1  | 0 | -6.107688 | -2.870129 | -0.136321 |
| 35 | 1  | 0 | -3.900770 | -3.884362 | -0.139870 |
| 36 | 13 | 0 | 0.647090  | -1.256619 | -0.074091 |

---

Table S5. XYZ coordinate of the optimized structure of  $X[Zn^{2+}]$ .

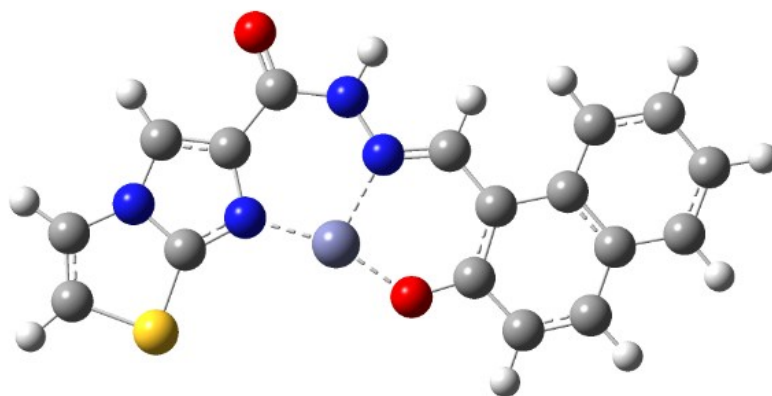

Standard orientation:

| Center Number | Atomic Number | Atomic Type | Coordinates (Angstroms) |           |           |
|---------------|---------------|-------------|-------------------------|-----------|-----------|
|               |               |             | X                       | Y         | Z         |
| 1             | 6             | 0           | 6.532962                | 0.437827  | 0.188181  |
| 2             | 6             | 0           | 6.709804                | -0.936416 | 0.549329  |
| 3             | 6             | 0           | 4.420584                | -0.447771 | -0.202046 |
| 4             | 6             | 0           | 3.071918                | 1.437293  | -0.129658 |
| 5             | 6             | 0           | 4.429053                | 1.853913  | -0.234984 |
| 6             | 6             | 0           | 1.766229                | 2.476288  | -0.002595 |
| 7             | 6             | 0           | -1.951267               | 1.082225  | 0.170241  |
| 8             | 6             | 0           | -2.877083               | -0.322027 | 0.058415  |
| 9             | 6             | 0           | -2.720708               | -1.894384 | -0.023000 |
| 10            | 6             | 0           | -4.019456               | -2.730404 | -0.081899 |
| 11            | 6             | 0           | -5.285948               | -2.161886 | -0.082205 |
| 12            | 6             | 0           | -5.456321               | -0.652509 | -0.023329 |
| 13            | 6             | 0           | -4.341879               | 0.189948  | 0.041400  |
| 14            | 6             | 0           | -4.558556               | 1.716588  | 0.101646  |
| 15            | 6             | 0           | -5.851305               | 2.254591  | 0.091000  |
| 16            | 6             | 0           | -7.069121               | 1.321745  | 0.019165  |
| 17            | 6             | 0           | -6.880043               | -0.062616 | -0.035101 |
| 18            | 16            | 0           | 5.298408                | -1.934736 | 0.084976  |
| 19            | 7             | 0           | 5.269785                | 0.664753  | -0.553914 |
| 20            | 7             | 0           | 3.171910                | -0.055049 | -0.150050 |
| 21            | 7             | 0           | 0.209979                | 2.410314  | 0.426403  |
| 22            | 7             | 0           | -0.631904               | 1.231594  | 0.224607  |
| 23            | 8             | 0           | 2.098269                | 3.652333  | -0.302996 |
| 24            | 8             | 0           | -1.550357               | -2.865742 | -0.064614 |
| 25            | 1             | 0           | 7.227660                | 1.213383  | 0.434774  |
| 26            | 1             | 0           | 7.573178                | -1.316993 | 1.053954  |
| 27            | 1             | 0           | 4.786923                | 2.853302  | -0.100626 |

|    |    |   |           |           |           |
|----|----|---|-----------|-----------|-----------|
| 28 | 1  | 0 | -0.244016 | 3.142746  | -0.080976 |
| 29 | 1  | 0 | -2.512215 | 1.992509  | 0.210501  |
| 30 | 1  | 0 | -3.712935 | 2.370261  | 0.152005  |
| 31 | 1  | 0 | -5.990512 | 3.314670  | 0.132884  |
| 32 | 1  | 0 | -8.058340 | 1.729513  | 0.010713  |
| 33 | 1  | 0 | -7.726876 | -0.714758 | -0.084951 |
| 34 | 1  | 0 | -6.149873 | -2.791732 | -0.124954 |
| 35 | 1  | 0 | -3.938601 | -3.796445 | -0.125711 |
| 36 | 30 | 0 | 0.597874  | -1.148971 | -0.065101 |

---
